# Supplementary material
Source: Research Square preprint supplement (doi:10.21203/rs.3.rs-8930515/v1)
Supplement: Supplementary file 1 [file 65436fef6b63f67a29b2b080.pdf]

# Supplementary Figure 1

ISH: Meflin mRNA

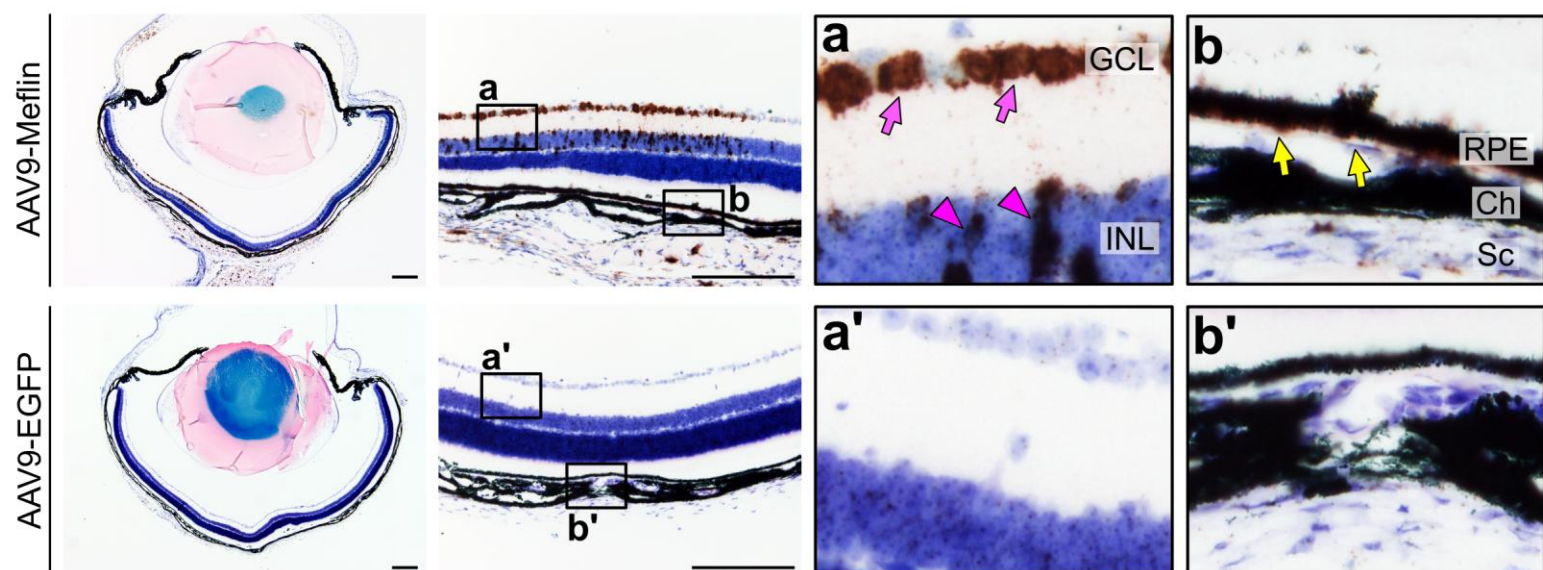

# Supplementary Figure 2

## Full-length blot for Fig. 1C

Meflin

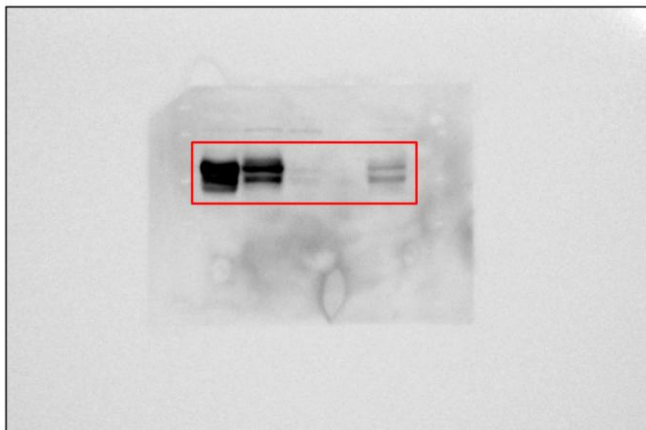

$\beta$ -actin

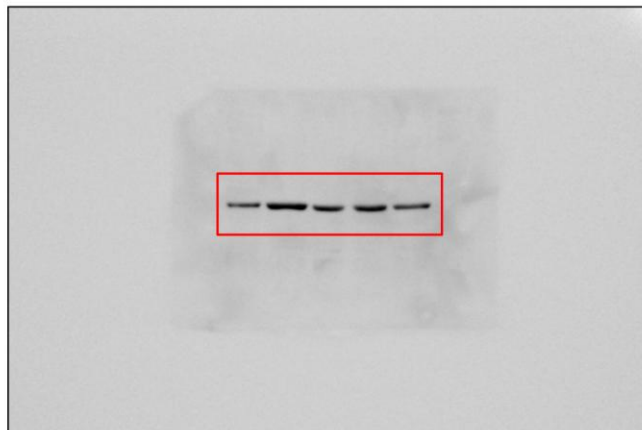

Meflin (Raw data with lower exposure)

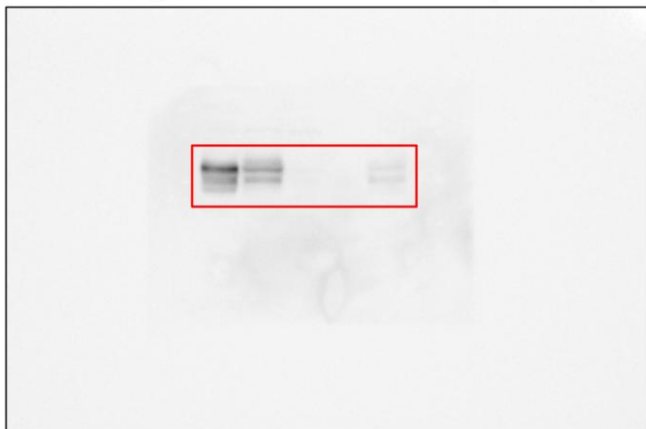

$\beta$ -actin (Raw data with lower exposure)

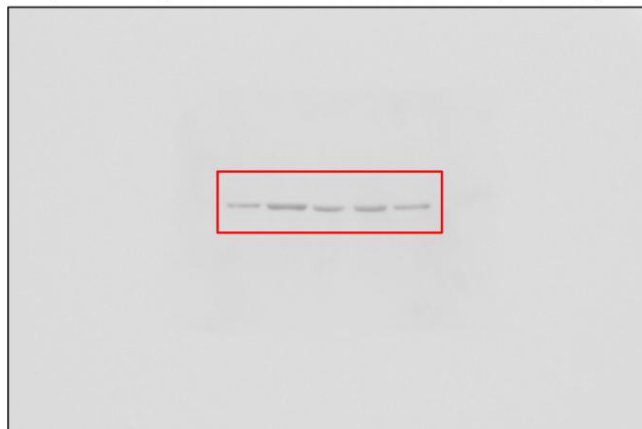

Red squares indicate cropped area.

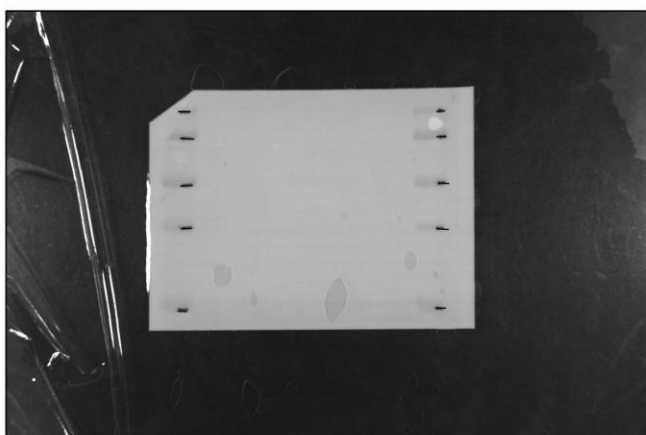

White-light image of the transferred membrane showing molecular weight markers.
